# Supplementary material for: Ligature-induced peri-implant infection in crestal and subcrestal implants: a clinical and radiographic study in dogs
Source: PeerJ. 2015 Jul 30;3:e1139. doi: 10.7717/peerj.1139 (PMC4525689; doi:10.7717/peerj.1139)
Supplement: Supplemental Information 1 [file peerj-03-1139-s001.xlsx]

## Sheet: Ligature data
group	IMPLANT	POSITION	DOG	mPLI0w	mPLI6w	mPLI12w	mBI0w	mBI6w	mBI12w	mPD0w	mPD6w	mPD12w	mAL0w	mAL6w	mAL12w	mIC0w	mIC6w	mIC12w	mRC0w	mRC6w	mRC12w	mHBL0w	mHBL6w	mHBL12w	mRLOS0w	mRLOS6w	mRLOS12w	mRI0w	mRI6w	mRI12w	chanPD	chanAL	chanICS12	chanIC012	chanRC	chanHBL	chanRLO	chanRI
a0	A	0	1	1	3	3	4	4	4	3	3	3	5	5.7	6	-1.43	-1.76	-1.89	0	0	0	0	0	0	-0.9	-1.23	-1.36	-1.43	-1.76	-1.89	0	1	-0.55	-0.46	0	0	-0.46	-0.46
a0	A	0	2	0.5	0.5	3	0.5	4	3	2.25	3.25	3.25	5	6.2	6	-0.63	-1.69	-2.3	0	-0.57	-1.06	0	1.21	1.52	-0.58	-1.07	-1.19	-0.63	-1.12	-1.24	1	1	-1.58	-1.67	-1.06	1.52	-0.61	-0.61
a0	A	0	3	2	3	3	2.5	4	3	2.75	3	3.5	5.7	5.2	6.5	-1.68	-1.85	-2.27	-0.305	-0.165	-0.43	0.42	0.28	0.97	-0.86	-1.17	-1.33	-1.37	-1.68	-1.84	0.8	0.8	-0.57	-0.595	-0.13	0.55	-0.47	-0.47
a0	A	0	4	1	2.5	1.5	2	4	3.5	2.5	3.75	3.25	4.7	5.9	6.4	-1.81	-1.98	-2.59	-1.025	-1.065	-1.525	1.02	0.94	1.49	-0.7	-0.83	-0.98	-0.78	-0.91	-1.06	0.8	1.8	-1.18	-0.78	-0.5	0.47	-0.28	-0.28
a0	A	0	5	2	2	3	2	4	4	3	3.25	4	5.3	6.3	5.8	-1.17	-1.71	-2.1	-0.575	-0.49	-0.7	0.66	0.75	0.8	-0.38	-1.01	-1.19	-0.59	-1.22	-1.4	1	0.5	-1.67	-0.935	-0.13	0.14	-0.81	-0.81
a0	A	0	6	1	2	3	2	3.5	4	3.25	3.5	3.75	5.2	5.7	6.2	-1.12	-2.08	-2.29	-1.225	-1.61	-1.74	0.69	1.28	1.53	-0.32	-0.9	-0.98	0.11	-0.47	-0.55	0.5	1	-2.15	-1.17	-0.52	0.84	-0.66	-0.66
a2	A	2	1	1	3	3	1.5	4	4	2.5	5.5	5.5	5.7	8.2	8.2	-0.21	-2.03	-2.72	-1.15	-2.73	-3.395	0.55	2.6	2.85	-0.96	-1.21	-1.23	0.95	0.7	0.68	3	2.5	-2.63	-2.51	-2.25	2.3	-0.27	-0.27
a2	A	2	2	1	2	3	1	3	3.5	2.75	4.5	4.75	5.4	6.9	7.1	-0.16	-1.1	-1.28	-0.82	-1.56	-1.455	0.72	1.01	1.21	-0.71	-0.9	-1.19	0.66	0.47	0.18	2	1.8	-1.03	-1.115	-0.64	0.5	-0.48	-0.48
a2	A	2	3	1	2.5	3	2	4	4	2.75	6	6	6.1	8.3	8.1	-0.69	-2.2	-2.49	-1.385	-2.965	-2.95	1.53	1.62	1.7	-0.64	-0.57	-0.87	0.7	0.77	0.46	3.3	2	-2.14	-1.8	-1.57	0.18	-0.24	-0.24
a2	A	2	4	1	3	3	2.5	3	4	4	5	4.5	6.1	7.3	7.1	-0.47	-1.03	-1.03	-1.465	-1.635	-1.62	0.88	-0.16	2.37	-1.05	-1.44	-1.46	1	0.61	0.59	0.5	1	-0.55	-0.565	-0.16	1.49	-0.41	-0.41
a2	A	2	5	2	1.5	3	1	4	4	3.25	4.75	6	5.9	7.4	7.6	0	-0.57	-0.83	-1.395	-1.345	-1.47	1.19	1.69	1.92	-0.24	-0.86	-0.99	1.4	0.78	0.64	2.8	1.8	-0.65	-0.83	-0.08	0.74	-0.76	-0.76
a2	A	2	6	1.5	2	3	4	3.5	4	3.5	4.75	6	5.5	7.3	8.3	-0.22	-1.18	-1.66	-0.945	-1.82	-2.07	1.21	0.52	1.05	-0.57	-0.65	-0.88	0.73	0.65	0.42	2.5	2.8	-1.07	-1.44	-1.13	-0.16	-0.32	-0.32
b0	B	0	1	1	2.5	3	2.5	4	4	2.5	4.5	4.75	4.4	5.6	6.9	-0.95	-1.88	-2.17	-0.45	-0.815	-0.725	0.22	0.88	0.84	-0.62	-1.19	-1.57	-0.5	-1.07	-1.45	2.3	2.5	-1.13	-1.225	-0.28	0.62	-0.95	-0.95
b0	B	0	2	2	2	3	2.5	4	4	2.5	4	4	5	6.5	6.3	-0.71	-1.39	-1.88	0	-0.355	-0.675	0	0.69	0.61	-0.96	-1.28	-1.45	-0.71	-1.03	-1.2	1.5	1.3	-1.45	-1.17	-0.68	0.61	-0.5	-0.5
b0	B	0	3	2	3	3	4	4	3.5	3	3.5	3.75	4.8	4.5	5	-1.33	-1.75	-1.89	0	0	0	0	0	0	-0.61	-1.03	-1.17	-1.33	-1.75	-1.89	0.8	0.3	-0.97	-0.56	0	0	-0.56	-0.56
b0	B	0	4	0.5	1.5	1.5	4	3.5	3.5	2.75	4.75	3.75	5	6	6	-1.13	-1.5	-1.37	-0.98	-1.075	-0.87	0.47	0.89	0.88	-0.62	-0.89	-0.97	-0.15	-0.42	-0.5	1	1	-0.41	-0.24	0.11	0.41	-0.35	-0.35
b0	B	0	5	2	1	3	1	4	4	2	4	5.5	4.6	6.6	7.4	-0.68	-1.47	-1.65	-0.595	-0.36	-0.53	0.26	0.36	0.56	-0.48	-1.5	-1.52	-0.08	-1.11	-1.12	3.5	2.8	-1.18	-0.975	0.06	0.31	-1.04	-1.04
b0	B	0	6	0	2.5	2	3	4	4	2.25	4	4.25	3.4	5.6	5.9	-1.07	-1.98	-2.26	0	-0.445	-0.65	0	1.21	1.35	-0.69	-1.16	-1.23	-1.07	-1.54	-1.61	2	2.5	-0.85	-1.19	-0.65	1.35	-0.54	-0.54
b2	B	2	1	1	3	3	0.5	4	4	1	5.5	6	4.9	8.7	8.9	-0.16	-1.11	-1.78	-1.51	-2.105	-2.665	0	1.35	1.53	-1.07	-1.43	-1.54	1.36	1	0.89	5	4	-1.64	-1.625	-1.16	1.53	-0.47	-0.47
b2	B	2	2	2	2.5	3	1	4	4	2.25	4.5	5	4.6	7.1	7.6	0	-1.04	-1.21	-1.09	-1.565	-1.675	0.74	1.21	1.23	-0.52	-1.08	-1.14	1.09	0.53	0.47	2.8	3	-1.03	-1.21	-0.59	0.5	-0.63	-0.63
b2	B	2	3	2	3	3	1.5	4	4	2.5	5	4.5	5.4	6.2	6.4	-1	-2.22	-2.37	-0.41	-0.97	-0.98	0.51	0.68	0.91	-0.76	-1.42	-1.56	-0.59	-1.25	-1.39	2	1	-1.52	-1.365	-0.57	0.41	-0.8	-0.8
b2	B	2	4	1	1.5	2	1	4	3.5	2	4.5	4.25	5.2	7.5	7.2	-0.96	-1.08	-1.33	-1.025	-0.855	-0.99	0.44	0.88	1.14	-1.39	-1.69	-1.8	0.07	-0.23	-0.34	2.3	2	-0.41	-0.375	0.03	0.7	-0.41	-0.41
b2	B	2	5	2	1.5	3	1.5	4	4	2.25	5	6	5.3	7.8	8.3	0	-1.64	-1.86	-1.04	-2.165	-2.3	0.65	2.36	2.4	-0.47	-0.98	-1.07	1.04	0.53	0.45	3.8	3	-1.86	-1.855	-1.26	1.75	-0.6	-0.6
b2	B	2	6	0	1.5	3	1.5	4	4	3	5.5	6.25	6.2	6.7	7.9	0	-0.95	-1.31	-0.795	-1.58	-1.635	0.56	1.85	1.2	-0.9	-1.06	-1.37	0.8	0.63	0.33	3.3	1.8	-1.31	-1.31	-0.84	0.64	-0.47	-0.47
